# Supplementary material for: Personal protective equipment use by healthcare workers in intensive care unit during the early phase of COVID-19 pandemic in Italy: a secondary analysis of the PPE-SAFE survey
Source: PubMed Central journal article supplement — Ther Adv Infect Dis. 2021 Feb 25;8:2049936121998562. doi: 10.1177/2049936121998562 (PMC7922607; doi:10.1177/2049936121998562), 2021-02-25
Supplement: sj-pdf-2-tai-10.1177_2049936121998562.pdf [file sj-pdf-2-tai-10.1177_2049936121998562.pdf]

## **Inchiesta sulla disponibilità di materiale di protezione individuale (Dispositivi di Protezione Individuale DPI)**

Questa inchiesta è stata concepita da un team di clinici per raccogliere informazioni a proposito di:

- l'uso e la disponibilità di materiale di protezione individuale (DPI)
- penuria, riutilizzo e soluzioni improvvisate
- formazione sull'uso di DPI
- effetti secondari negativi in relazione all'uso di DPI

che sono a disposizione degli operatori sanitari attivi nelle Unità di Terapia Intensiva di tutto il mondo. Vorremmo avere un risposta da tutti i membri dello staff (infermieri, medici, personale medico di ogni grado di formazione, personale di pulizia) coinvolti direttamente nella cura di pazienti in terapia intensiva affetti da COVID19 o sospetti.

I dati sono anonimi, non viene raccolto nessun dato di identificazione.

Questa inchiesta viene sostenuta dalla ESICM ( European Society of Intensive Care Medicine) e dalla ESCMID e ESGCIP.

La vostra partecipazione è facoltativa.

Se partecipate, acconsentite alla raccolta delle informazioni dell'inchiesta.

## Inchiesta sui DPI

1. Siete un operatore sanitario coinvolto della cura di pazienti con COVID19 in terapia intensiva?
  - a. SÌ ( continua l'inchiesta)
  - b. NO (passa alla fine dell'inchiesta)
  
2. NAZIONE
  
3. Città ( opzionale)
  
4. Tipo di ospedale
  - a. Ospedale universitario di terzo livello
  - b. Ospedale pubblico urbano ( "Community hospital")
  - c. Ospedale regionale/ rurale
  - d. Clinica privata
  
5. Al momento le vostre unità di terapia intensiva funzionano :
  - a. al di sotto della capacità
  - b. carico di lavoro usuale
  - c. al di sopra della capacità
  - d. molto al di sopra della capacità con necessità di espansione in altre aree
  - e. non definito
  
6. Numero usuale di letti di terapia intensiva dell'ospedale con possibilità di ventilazione invasiva  
*testo*
  
7. Numero attuale di letti di terapia intensiva dell'ospedale inclusa l'estensione di capacità per i pazienti COVID19  
*testo*
  
8. Posto di lavoro attuale
  - a. Unità di terapia intensiva riservate a pazienti COVID19
  - b. Unità di terapia medicina intensiva che possono ricevere anche pazienti COVID19
  - c. Altri unità o reparti convertiti in unità di terapia intensiva per la pandemia COVID19 e riservate a pazienti COVID19
  - d. Altro, *per favore descriva*
  
9. Funzione (*una sola risposta possibile*)
  - a. Infermiera
  - b. Allieva infermiera
  - c. Assistente di cura
  - d. Fisioterapista

- e. Terapista della respirazione
  - f. Persona addetta alla pulizia
  - g. Stagista o residente junior
  - h. Specializzando o residente senior
  - i. Medico specialista
  - j. Logopedista
  - k. Altro (*specificare*)
10. Specialità o luogo di lavoro usuale
- a. Terapia intensiva
  - b. Anestesiologia
  - c. Pronto Soccorso
  - d. Reparto/unità di Medicina Interna
  - e. Reparto/unità di Chirurgia
  - f. Altro

11. Età  
In anni : *testo libero*

12. Genere
- a. femminile
  - b. maschile
  - c. altro
  - d. indefinito

13. Anni di esperienza in terapia intensiva (postgraduate)  
*testo libero*

Come disponibile è definito se raccomandato e se è nelle riserve è a disposizione di chi sta rispondendo all'inchiesta

14. Che tipo di DPI usa nella cura di routine dei pazienti con COVID19 (*crocia tutte le risposte pertinenti*)  
*Se più situazioni sono applicabile scegli il livello massimo usato per le cure di routine*
- a. Maschere chirurgiche o equivalenti
  - b. N95 / FFP2 o maschere equivalenti
  - c. Maschera FFP3
  - d. Respiratori elettroventilati con purificazione dell'aria (powered air purification respirator PAPR)
  - e. Protezione degli occhi : occhiali di protezione
  - f. Protezione degli occhi: visiera di protezione
  - g. Grembiule senza maniche
  - h. Camice a maniche lunghe impermeabile
  - i. Tuta impermeabile a protezione di tutto il corpo
  - j. Guanti semplici

- k. Guanti doppi
  - l. Sovrascarpe
  - m. Cuffia
  - n. Copricapo che comprende anche il collo
  - o. Cappuccio impermeabile
  - p. Altro (*prego descrivere*)
15. In aggiunta a quanto sopra: che tipo di DPI avete a disposizione nel caso di intubazione di un paziente affetto da COVID19 ( crocia tutte le risposte pertinenti)
- a. Nessuna
  - b. Non so
  - c. Maschera chirurgica o equivalente
  - d. N95/ FFP2 o equivalente
  - e. Maschera FFP3
  - f. Respiratori elettroventilati con purificazione dell'aria ( powered air purification respirator PAPR)
  - g. Protezione degli occhi: occhiali di protezione
  - h. Protezione degli occhi: visiera di protezione
  - i. Grembiule senza maniche
  - j. Camice a maniche lunghe impermeabile
  - k. Tuta impermeabile a protezione di tutto il corpo
  - l. Guanti semplici
  - m. Guanti doppi
  - n. Sovrascarpe
  - o. Cuffia
  - p. Copricapo che comprende anche il collo
  - q. Cappuccio impermeabile
  - r. Altro (*prego descrivere*)
16. Ci sono DPI che normalmente usereste e che attualmente non sono disponibili? ( *crociare tutte le risposte pertinenti*)
- a. Nessuna
  - b. Non so
  - c. Maschera chirurgica o equivalente
  - d. N95/ FFP2 o equivalente
  - e. Maschera FFP3
  - f. Respiratori elettroventilati con purificazione dell'aria ( powered air purification respirator PAPR)
  - g. Protezione degli occhi: occhiali di protezione
  - h. Protezione degli occhi: visiera di protezione
  - i. Grembiule senza maniche
  - j. Camice a maniche lunghe impermeabile
  - k. Tuta impermeabile a protezione di tutto il corpo
  - l. Guanti semplici
  - m. Guanti doppi
  - n. Sovrascarpe

- o. Cuffia
- p. Copricapo che comprende anche il collo
- q. Cappuccio impermeabile
- r. Altro (*prego descrivere*)

17. Ci sono dei DPI monouso che vengono lavati o riutilizzati a causa di una mancanza di disponibilità negli stock

- a. Nessuna
- b. Non so
- c. Maschera chirurgica o equivalente
- d. N95/ FFP2 o equivalente
- e. Maschera FFP3
- f. Respiratori elettroventilati con purificazione dell'aria ( powered air purification respirator PAPR)
- g. Protezione degli occhi: occhiali di protezione
- h. Protezione degli occhi: visiera di protezione
- i. Grembiule senza maniche
- j. Camice a maniche lunghe impermeabile
- k. Tuta impermeabile a protezione di tutto il corpo
- l. Guanti semplici
- m. Guanti doppi
- n. Sovrascarpe
- o. Cuffia
- p. Copricapo che comprende anche il collo
- q. Cappuccio impermeabile
- r. Altro: *prego descrivere*

18. Utilizzate DPI “improvvisate”, “fatte in casa”?

- a. Maschere “confezionate in casa” di stoffa / cotone
- b. Camici “confezionati in casa” per esempio di stoffa, di plastica o con teli chirurgici
- c. Occhiali o visiere di protezione prodotti con stampatrice 3D
- d. No
- e. Altro: *prego specificare*

19. Pensa che i DPI che ha a disposizione per la cura di pazienti COVID19, la proteggano adeguatamente?

- a. Non mi fido per niente
- b. Mi fido poco
- c. Mi fido un po'
- d. Mi fido
- e. Mi fido completamente

20. Se no, che equipaggiamento supplementare dovrebbe procurarle la sua istituzione?

- a. Maschere chirurgiche o equivalenti
- b. N95 / FFP2 o maschere equivalenti
- c. Maschera FFP3
- d. Respiratori elettroventilati con purificazione dell'aria ( powered air purification respirator PAPR)
- e. Protezione degli occhi : occhiali di protezione
- f. Protezione degli occhi: visiera di protezione
- g. Grembiule senza maniche
- h. Camice a maniche lunghe impermeabile
- i. Tuta impermeabile a protezione di tutto il corpo
- j. Guanti semplici
- k. Guanti doppi
- l. Sovrascarpe
- m. Cuffia
- n. Copricapo che comprende anche il collo
- o. Cappuccio impermeabile
- q. Altro: *prego specificare*

21. Siete stati istruiti formalmente nell'uso delle DPI raccomandate per le infezioni che si trasmettono per via aerea? (*crociare per favore tutte le risposte pertinenti*)

- a. Sì , all'inizio della mia attività in questo servizio
- b. Sì, nel corso degli ultimi 2 mesi a causa della pandemia COVID19
- c. Sì , in un altro momento ma non negli ultimi 2 mesi
- d. No

22. Pensa che le gioverebbe un' ulteriore istruzione e un training nell'uso dei DPI? (*crociare per favore tutte le risposte pertinenti*)

- a. Sì, istruzione teorica e documentazione scritta
- b. Sì, dimostrazione pratica da parte di esperti nel controllo delle infezioni
- c. Sì, training basato su simulazioni
- d. No

23. Ha avuto una verifica formale dell'adeguatezza dell'applicazione di una maschera N95 o equivalente?

*Verifica formale della tenuta stagna dei bordi della maschera basata sulla percezione olfattiva o su uno strumento che misura il grado di un'eventuale perdita*

- a. Sì , all'inizio della mia attività in questo servizio
- b. Sì, nel corso degli ultimi 2 mesi a causa della pandemia COVID19
- c. Sì , in un altro momento ma non negli ultimi 2 mesi
- d. No

24. Quanto si sente sicuro di sapere come usare in maniera sicura i DPI raccomandati per la cura di pazienti COVID19 nel suo servizio?

- a. Per niente sicuro
- b. Poco sicuro

- c. Abbastanza sicuro
- d. Sicuro
- e. Molto sicuro

25. Ha a disposizione 2 persone per indossare e togliere i DPI (una per i DPI, una per la supervisione e l'assistenza)?

- a. Sempre per indossare e per togliere
- b. Soltanto per indossare
- c. Soltanto per togliere
- d. Ogni tanto
- e. Mai

26. Quanto dura di solito un turno con DPI (per quanto tempo resta abbigliato con i DPI prima di poter fare una pausa)?

*Testo* In ore .....

27. Soffre di un qualche disturbo significativo quando lavora con i DPI (non in relazione al COVID). Lo citi solo se lo considera veramente significativo.

- a. Spossatezza estrema
- b. Impossibilità di usare il bagno
- c. Cefalea come sintomo di un'ipercapnia
- d. Sete
- e. Sensazione di calore
- f. Zone di pressione
- g. Altro : *specifica*

28. Altri commenti

*Testo*
